# Supplementary material for: Zahora, a new monotypic genus from tribe Brassiceae (Brassicaceae) endemic to the Moroccan Sahara
Source: PhytoKeys. 2019 Dec 5;135:119–31. doi: 10.3897/phytokeys.135.46946 (PMC6908512; doi:10.3897/phytokeys.135.46946)
Supplement: Supplementary material 1 [file phytokeys-135-119-s001.xls]

## Sheet: Morphomatrix_Brassicinae
Character*	Genera related to Zahora															Further Brassiceae genera with less significant affinities
	Brassica	Cordylocarpus	Crambella	Diplotaxis	Erucastrum	Guiraoa	Hirschfeldia	Raffenaldia	Rapistrum	Sinapis	Trachystoma	Morisia	Otocarpus	ZAHORA	Character state realized among 37 characters	Cakile	Crambe	Zilla	Raphanus	Eruca	Erucaria	Hemicrambe
A_01_1	1	1	1	1	1	1	1	0	1	1	1	0	1	1	annual	1	1	0	1	1	1	0
A_01_2	1	0	0	1	1	0	0	1	1	1	0	1	0	0		1	1	1	0	0	0	1
A_02_1	1	1	1	1	1	1	1	1	1	1	1	1	1	1	herb	1	1	0	1	1	1	1
A_02_2	1	0	0	1	1	0	0	0	0	0	0	0	0	0		0	1	1	0	0	0	1
A_02_3	0	0	0	0	0	0	0	0	0	0	0	0	0	0		0	0	0	0	0	0	0
B_03_1	1	1	1	1	1	1	1	1	1	1	1	1	1	1	absent glandular hairs	1	1	1	1	1	1	1
B_03_2	0	0	0	0	0	0	0	0	0	0	0	0	0	0		0	0	0	0	0	0	0
B_04_1	1	0	1	1	1	0	0	0	1	0	0	0	0	0		1	1	1	0	1	1	1
B_04_2	1	1	0	1	1	1	1	1	1	1	1	1	1	1	simple trichomes	1	1	0	1	1	1	0
B_04_3	0	0	0	0	0	0	0	0	0	0	0	0	0	0		0	0	0	0	0	0	0
B_04_4	0	0	0	0	0	0	0	0	0	0	0	0	0	0		0	0	0	0	0	0	0
C_05_1	0	0	0	0	0	0	0	0	0	0	0	0	0	0		0	0	1	0	0	0	0
C_05_2	1	1	1	1	1	1	1	1	1	1	1	1	1	1	no stem thorns	1	1	0	1	1	1	1
D_06_1	1	0	0	1	1	1	1	1	0	1	1	1	0	1	rosulate basal leaves forming a rosette	0	1	0	1	1	1	0
D_06_2	1	1	1	1	1	0	0	0	1	1	0	0	1	0		1	0	1	1	1	1	1
D_07_1	1	0	0	1	0	0	0	0	0	0	0	0	0	0		1	0	1	0	0	0	1
D_07_2	1	1	0	1	1	1	0	0	1	1	1	0	0	0		0	1	0	1	1	0	0
D_07_3	1	1	0	1	1	1	1	1	1	1	1	1	1	1	leaf margin pinnately lobed	0	1	0	1	1	0	1
D_07_4	1	0	1	1	1	1	1	1	1	1	0	1	1	0		0	1	0	1	1	1	1
D_07_5	0	0	0	0	0	0	0	0	0	0	0	0	0	0		0	0	0	0	0	0	0
D_08_1	1	1	1	1	1	1	1	0	1	1	1	0	1	1	stem leaves present	1	1	1	1	1	1	1
D_08_2	1	0	0	1	0	0	0	1	0	0	0	1	0	0		0	0	0	0	0	0	0
D_09_1	1	0	0	1	0	0	0	1	0	0	0	1	0	0		0	0	0	0	0	0	0
D_09_2	1	0	1	1	1	1	1	0	1	1	1	0	1	1	petiolate stem leaves	1	1	0	1	1	1	1
D_09_3	1	1	0	1	1	0	0	0	0	0	0	0	0	0		1	0	1	0	1	0	0
D_09_4	1	0	0	1	0	0	0	0	0	0	0	0	0	0		0	0	0	0	0	0	0
D_10_1	1	0	0	1	0	0	0	1	0	0	0	1	0	0		0	0	0	0	0	0	0
D_10_2	1	1	0	1	1	1	1	0	1	1	1	0	0	1	stem leaves entire to sinuate	1	1	1	1	1	1	1
D_10_3	1	1	0	1	1	1	1	0	1	1	1	0	1	0		1	1	0	1	1	1	1
D_10_4	1	0	1	1	1	1	0	0	0	1	0	0	0	0		1	1	0	1	1	1	0
D_10_5	0	0	0	0	0	0	0	0	0	0	0	0	0	0		0	0	0	0	0	0	0
D_11_1	0	0	0	0	0	0	0	0	0	0	0	0	0	0		0	0	0	0	0	0	0
D_11_2	1	1	1	1	1	1	1	1	1	1	1	1	1	1	leaf thornes absent	1	1	1	1	1	1	1
E_12_1	0	0	0	0	1	0	0	0	0	0	0	0	0	0		0	0	0	0	0	0	0
E_12_2	1	1	1	1	1	1	1	0	1	1	1	0	1	1	ebracteate raceme	1	1	1	1	1	1	1
E_12_3	0	0	0	0	0	0	0	1	0	0	0	1	0	0		0	0	0	0	0	0	0
E_13_1	0	0	0	0	0	0	0	0	0	0	0	0	0	0		0	1	0	0	0	0	0
E_13_2	1	1	1	1	1	1	1	1	1	1	1	1	1	1	petals distinctly longer than sepals	1	1	1	1	1	1	1
E_13_3	0	0	0	0	0	0	0	0	0	0	0	0	0	0		1	1	0	0	0	0	0
E_13_4	0	0	0	0	0	0	0	0	0	0	0	0	0	0		1	1	0	0	0	0	0
E_14_1	1	0	0	1	1	0	0	0	0	1	0	0	0	0		1	1	0	1	0	1	1
E_14_2	1	1	0	1	1	1	1	1	1	1	1	1	1	1	petal colour yellow (pale Y.)	0	1	0	1	1	0	1
E_14_3	1	0	1	1	0	0	0	1	0	0	0	0	0	0		1	0	1	1	0	1	0
E_14_4	0	0	0	0	0	0	0	0	0	0	0	0	0	0		0	0	0	0	0	0	0
E_14_5	0	0	0	0	0	0	0	0	0	0	0	0	0	0		0	0	0	0	0	0	0
E_15_1	1	1	1	1	1	1	1	1	1	1	1	1	1	1	petal shape: wide in upper part	1	1	1	1	1	1	1
E_15_2	1	0	0	1	1	0	1	1	0	0	0	0	0	0		1	0	0	0	0	0	0
E_15_3	0	0	0	0	0	0	0	1	0	0	0	0	0	0		0	0	0	0	0	0	0
E_16_1	1	1	1	1	1	1	1	1	1	1	1	1	1	1	petal apex obtuse	1	1	1	1	1	1	1
E_16_2	0	0	0	0	0	0	0	0	0	0	0	0	0	0		0	0	0	0	0	0	0
E_16_3	0	0	0	0	0	0	0	0	0	0	0	0	0	0		0	0	0	0	0	0	0
E_17_1	1	1	1	1	1	1	1	1	1	1	1	1	1	1	petal margin entire	1	1	1	1	1	1	1
E_17_2	0	0	0	0	0	0	0	0	0	0	0	0	0	0		0	0	0	0	0	0	0
E_17_3	0	0	0	0	0	0	0	0	0	0	0	0	0	0		0	0	0	0	0	0	0
E_17_4	0	0	0	0	0	0	0	0	0	0	0	0	0	0		0	0	0	0	0	0	0
E_18_1	1	0	1	1	1	0	0	1	0	0	1	0	1	0		1	0	1	1	1	1	1
E_18_2	1	1	0	1	1	1	0	0	1	0	1	1	1	1	erect sepals	1	1	0	0	0	1	1
E_18_3	0	0	0	1	0	0	1	0	0	1	0	0	0	0		0	1	0	0	0	0	0
E_18_4	0	0	0	0	0	0	1	0	0	1	0	0	0	0		0	0	0	0	0	0	0
E_19_1	1	1	1	1	1	1	1	1	1	1	1	1	1	1	sepals free	1	1	1	1	1	1	1
E_19_2	0	0	0	0	0	0	0	0	0	0	0	0	0	0		0	0	0	0	0	0	0
E_20_1	1	1	1	1	1	1	1	1	1	1	1	1	1	1	stamen number 6	1	1	1	1	1	1	1
E_20_2	0	0	0	0	0	0	0	0	0	0	0	0	0	0		0	0	0	0	0	0	0
E_20_3	0	0	0	0	0	0	0	0	0	0	0	0	0	0		0	0	0	0	0	0	0
E_20_4	0	0	0	0	0	0	0	0	0	0	0	0	0	0		0	0	0	0	0	0	0
E_21_1	1	1	1	1	1	1	1	1	1	1	1	1	1	1	lower part of filaments and petal claws without any structure	1	0	1	1	1	1	1
E_21_2	0	0	0	0	0	0	0	0	0	0	0	0	0	0		0	1	0	0	0	0	0
E_21_3	0	0	0	0	0	0	0	0	0	0	0	0	0	0		0	0	0	0	0	0	0
E_22_1	1	1	1	1	1	1	1	1	1	1	1	1	1	1	filaments free	1	1	1	1	1	1	1
E_22_2	0	0	0	0	0	0	0	0	0	0	0	0	0	0		0	0	0	0	0	0	0
E_23_1	1	1	1	1	1	1	1	1	1	1	1	1	1	1	flower symmetry is actinomorphic	1	1	1	1	1	1	1
E_23_2	0	0	0	0	0	0	0	0	0	0	0	0	0	0		0	0	0	0	0	0	0
F_24_1	1	1	0	1	1	0	1	1	0	1	1	0	0	1	fruit type silique	1	0	0	1	1	1	1
F_24_2	1	0	1	0	0	1	0	0	1	0	0	1	1	0		1	1	1	1	0	1	0
F_25_1	0	0	0	0	0	0	0	0	0	0	0	0	0	0		0	0	0	0	0	0	0
F_25_2	1	0	0	1	0	0	0	1	0	1	0	0	1	0		0	0	0	0	0	0	1
F_25_3	1	1	1	1	1	1	1	0	1	1	1	1	0	1	angustiseptate fruit which are terete	1	1	1	1	1	1	1
F_25_4	1	0	0	0	1	0	0	1	0	0	0	0	0	0		1	1	1	0	1	0	0
F_26_1	0	1	1	0	0	1	1	1	1	0	0	1	1	0		1	1	1	1	0	1	0
F_26_2	1	0	0	1	1	1	1	0	0	1	1	1	0	1	fruit wall thin and leathery	0	0	0	0	1	1	1
F_26_3	0	0	0	0	0	0	0	0	0	0	0	0	0	0		0	0	0	0	0	0	0
F_27_1	1	0	0	1	1	1	1	0	0	1	1	1	0	1	dehiscent in lower part, but heteroarthrocarpic in Zahora	0	0	0	0	1	1	1
F_27_2	0	0	0	0	0	0	0	1	0	0	0	0	0	0		0	0	1	1	0	0	1
F_27_3	0	1	1	0	0	1	0	0	1	0	0	1	1	0		1	1	0	1	0	1	1
F_28_1	1	0	0	1	0	0	0	0	0	0	0	0	0	0		0	0	0	0	0	0	0
F_28_2	1	1	1	1	1	1	1	1	1	1	1	1	1	1	gynophore in fruit absent	1	1	1	1	1	1	1
F_29_1	0	0	0	0	0	0	0	1	1	0	0	0	0	0		0	1	0	1	0	1	0
F_29_2	1	1	1	1	1	1	1	0	1	1	1	1	1	1	septum in mature fruit is complete	1	0	1	0	1	1	1
F_30_1	1	1	1	1	1	1	1	1	0	0	0	1	0	1	stigma are entire	1	1	0	1	0	1	1
F_30_2	1	0	0	1	1	0	0	0	1	1	1	0	1	0		0	0	0	1	0	0	1
F_30_3	0	0	0	0	0	0	0	0	0	0	0	0	0	0		0	0	1	0	1	0	0
F_31_1	0	1	0	0	0	1	0	0	0	0	0	0	1	0		0	0	1	0	0	0	0
F_31_2	1	0	1	1	1	0	1	1	1	1	1	1	0	1	fruit appendices are missing	1	1	1	1	1	1	1
F_32_1	0	1	1	0	0	0	0	0	1	0	0	0	1	0		1	1	1	1	0	0	1
F_32_2	1	1	1	0	0	1	1	1	1	1	1	1	1	0		1	0	0	1	0	1	1
F_32_3	1	0	0	1	1	0	1	0	0	1	1	1	0	0		0	0	0	1	1	1	0
F_32_4	1	0	0	1	1	0	1	0	0	0	0	0	0	1	more than 20 seeds per fruit	0	0	0	0	1	0	0
F_33_1	1	1	0	1	1	1	1	1	0	1	1	1	0	0		0	0	0	1	0	1	1
F_33_2	1	0	0	1	0	0	0	0	0	0	0	1	0	1	seeds are arranged biseriate in middle of fruit	0	0	0	0	1	0	0
F_33_3	0	0	1	0	0	0	0	0	1	0	0	1	1	0		1	1	1	0	0	0	0
F_34_1	0	0	0	0	0	0	0	0	0	0	0	0	0	0		0	0	0	0	0	0	0
F_34_2	1	1	1	1	1	1	1	1	1	1	1	1	1	1	seed wing is missing	1	1	1	1	1	1	1
F_35_1	0	0	0	0	0	0	0	0	0	0	0	0	0	0		1	0	0	0	0	0	0
F_35_2	0	0	0	0	0	0	0	0	0	0	0	0	0	0		1	0	0	0	0	1	0
F_35_3	1	1	1	1	1	1	1	1	1	1	1	1	1	1	cotyledons are arranged conduplicate	0	1	1	1	1	1	1
F_35_4	0	0	0	0	0	0	0	0	0	0	0	0	0	0		1	0	0	0	0	1	0
F_35_5	0	0	0	0	0	0	0	0	0	0	0	0	0	0		0	0	0	0	0	0	0
F_36_1	1	0	0	1	1	0	1	0	0	1	0	0	0	1	seed mucilage present	0	0	0	0	1	0	0
F_36_2	1	1	1	1	1	1	0	1	1	1	1	1	1	0		1	1	1	1	0	1	1
F_37_1	1	1	1	1	1	1	1	1	1	1	1	0	1	1	fruit orientation is spreading	1	1	1	1	1	1	1
F_37_2	1	0	0	1	0	0	1	1	0	0	0	1	0	0		0	0	0	0	0	1	0
	BRASSICA			DIPLOTAXIS										ZAHORA
* orange: no variation among genera if compared to Zahora
